# Supplementary material for: Validation and Clinical Application of ONCOaccuPanel for Targeted Next-Generation Sequencing of Solid Tumors
Source: PubMed Central journal article supplement — Cancer Res Treat. 2022 Nov 25;55(2):429–41. doi: 10.4143/crt.2022.891 (PMC10101781; doi:10.4143/crt.2022.891), 2023-04
Supplement: crt-2022-891-Supplementary-Fig-1.pdf [file crt-2022-891-Supplementary-Fig-1.pdf]

## Entire coding gene exons (225 genes)

|        |        |          |          |        |        |        |         |         |        |        |        |        |        |        |
|--------|--------|----------|----------|--------|--------|--------|---------|---------|--------|--------|--------|--------|--------|--------|
| ABL1   | ABL2   | ABRAXAS1 | AKT1     | AKT2   | AKT3   | ALK    | APC     | AR      | ARAF   | ARID1A | ARID1B | ARID2  | ASXL1  | ATM    |
| ATR    | ATRX   | AURKA    | AURKB    | AURKC  | AXIN1  | AXL    | BAP1    | BARD1   | BRAF   | BRCA1  | BRCA2  | BRD2   | BRD3   | BRD4   |
| BRIP1  | CBFB   | CCND1    | CCND2    | CCND3  | CCNE1  | CD274  | CDH1    | CDK12   | CDK4   | CDK6   | CDKN1A | CDKN1B | CDKN2A | CDKN2B |
| CDKN2C | CEBPA  | CHEK2    | CREBBP   | CSF1R  | CTNNB1 | DDR1   | DDR2    | DDX3X   | DNMT3A | DOT1L  | DPYD   | EGFR   | EPHA3  | EPHB4  |
| ERBB2  | ERBB3  | ERBB4    | ERCC2    | ERCC4  | ERG    | ERRFI1 | ESR1    | ETV1    | ETV4   | ETV5   | ETV6   | EWSR1  | EZH2   | FANCA  |
| FANCB  | FANCC  | FANCD2   | FANCE    | FANCF  | FANCG  | FANCI  | FANCL   | FANCM   | FBXW7  | FGF19  | FGF4   | FGFR1  | FGFR2  | FGFR3  |
| FGFR4  | FLCN   | FLT1     | FLT3     | FLT4   | FOXL2  | FUBP   | GATA2   | GEN1    | GNA11  | GNAQ   | GNAS   | H3F3A  | HDAC9  | HGF    |
| HLA-A  | HLA-B  | HLA-C    | HLA-DRB1 | HNF1A  | HRAS   | IDH1   | IDH2    | IGF1R   | IGF2   | JAK1   | JAK2   | JAK3   | KDR    | KIT    |
| KMT2A  | KRAS   | LRP1B    | LTK      | MAP2K1 | MAP2K2 | MAP2K4 | MAP3K1  | MAP3K4  | MAPK1  | MAPK3  | MAPK8  | MCL1   | MDM2   | MDM4   |
| MED12  | MEN1   | MET      | MITF     | MLH1   | MPL    | MRE11  | MSH2    | MSH6    | MTAP   | MTOR   | MYC    | MYCN   | NBN    | NF1    |
| NF2    | NFKBIA | NKX2-1   | NOTCH1   | NOTCH2 | NOTCH3 | NOTCH4 | NRAS    | NTRK1   | NTRK2  | NTRK3  | NUTM1  | PALB2  | PARP1  | PBRM1  |
| PDGFB  | PDGFRA | PDGFRB   | PIK3CA   | PIK3CB | PIK3CD | PIK3R1 | PIK3R2  | PMS2    | POLE   | PPARG  | PTCH1  | PTCH2  | PTEN   | PTPN11 |
| RAD50  | RAD51  | RAD51C   | RAD51D   | RAF1   | RARA   | RB1    | RET     | RICTOR  | RNF43  | ROS1   | RSPO1  | RSPO2  | RUNX1  | SDHA   |
| SDHB   | SDHC   | SDHD     | SETD2    | SLX4   | SMAD2  | SMAD4  | SMARCA4 | SMARCB1 | SMO    | SOX2   | SOX9   | SPOP   | SRC    | STK11  |
| SYK    | TERT   | TET2     | TMPRSS2  | TOP1   | TOP2A  | TP53   | TSC1    | TSC2    | UBE2T  | VHL    | WT1    | XPO1   | XRCC2  | ZNRF3  |

Yellow : Gene with entire coding exon and partial intron region

Green : Gene with entire coding exon and promoter region with low coverage

## Partial exon and hot spot (98 genes)

|        |         |         |          |        |        |         |         |         |         |         |        |        |         |
|--------|---------|---------|----------|--------|--------|---------|---------|---------|---------|---------|--------|--------|---------|
| A1BG   | ABCC5   | ACVR2A  | ADAMTS18 | ADNP   | AKAP7  | AP1S1   | ARV1    | ASH1L   | BAX     | BTK     | CASD1  | CBL    | CBX4    |
| CCDC73 | CD3G    | CDH26   | CEBPZ    | CENPV  | CIC    | CKAP2   | CLOCK   | COBLL1  | CPEB2   | CRIPAK  | DLC1   | DNAH12 | DOCK3   |
| DPAGT1 | DYNC1I2 | EBPL    | EPPK1    | FBXL3  | FGFBP1 | FMN2    | FRG2B   | FXR1    | GRIN3B  | GTPBP2  | IFITM1 | IFITM3 | IMPA1   |
| INO80E | IRS1    | KCTD16  | KLF4     | KNSTRN | KRT32  | LIPT1   | MADCAM1 | MAX     | MFSD14A | MFSD4B  | MVK    | MYO1A  | NFE2L2  |
| NIPA2  | NNAT    | NOS3    | NOTCH2NL | NUDT7  | OR4M2  | PABPC1  | PCBP1   | PCDHB16 | PCMTD1  | PPP2R1A | PREX2  | PRIM2  | RAC1    |
| RASA4  | RBBP8   | RGS12   | RHOA     | RUFY2  | SEC63  | SF3B1   | SLC23A2 | SPRR3   | SSTR4   | TAMBPL1 | STAT3  | STAU2  | SULT6B1 |
| SYNJ2  | TAS2R19 | TAS2R31 | TCF7L2   | TEAD2  | TMEM60 | TMPRSS1 | TPSD1   | U2AF1   | WDR55   | WDR87   | ZFP37  | ZNF141 | ZNF563  |

| Tier | Fusion Name   | Tumor Type                         | Gene   | Chr | Start     | Stop      | Gene     | Chr | Start     | Stop      |
|------|---------------|------------------------------------|--------|-----|-----------|-----------|----------|-----|-----------|-----------|
| I    | NPM-ALK       | Anaplastic Large Cell Lymphoma     | NPM    | 5   | 170814120 | 170818803 | ALK †    | 2   | 29415640  | 29446394  |
| II   | NPM-ALK       | Cancer                             | NPM    | 5   | 170814120 | 170818803 | ALK †    | 2   | 29415640  | 29446394  |
| II   | RANBP2-ALK    | Inflammatory Myofibroblastic Tumor | RANBP2 | 2   | 109335937 | 109375004 | ALK †    | 2   | 29415640  | 29446394  |
| II   | CLTC-ALK      | Diffuse Large B-cell Lymphoma      | CLTC   | 17  | 57697219  | 57768072  | ALK †    | 2   | 29415640  | 29446394  |
| II   | EML4-ALK      | Lung Acinar Adenocarcinoma         | EML4   | 2   | 42396490  | 42522656  | ALK †    | 2   | 29415640  | 29446394  |
| II   | EML4-ALK      | Non-Small Cell Lung Cancer         | EML4   | 2   | 42396490  | 42528380  | ALK †    | 2   | 29415640  | 29446394  |
| II   | EML4-ALK      | Non-Small Cell Lung Cancer         | EML4   | 2   | 42396490  | 42522656  | ALK †    | 2   | 29415640  | 29446394  |
| II   | EML4-ALK      | Non-Small Cell Lung Cancer         | EML4   | 2   | 42396490  | 42552694  | ALK †    | 2   | 29415640  | 29446394  |
| II   | EML4-ALK      | Non-Small Cell Lung Cancer         | EML4   | 2   | 42396490  | 42491871  | ALK †    | 2   | 29415640  | 29446394  |
| II   | EML4-ALK      | Non-Small Cell Lung Cancer         | EML4   | 2   | 42396490  | 42472827  | ALK †    | 2   | 29415640  | 29446394  |
| II   | EML4-ALK      | Renal Cell Carcinoma               | EML4   | 2   | 42396490  | 42472827  | ALK †    | 2   | 29415640  | 29446394  |
| II   | EML4-ALK      | Cancer                             | EML4   | 2   | 42396490  | 42552694  | ALK †    | 2   | 29415640  | 29446394  |
| II   | EGFR-PPARGC1A | Cutaneous Squamous Cell Carcinoma  | EGFR † | 7   | 55238867  | 55238867  | PPARGC1A | 4   | 55238867  | 55238867  |
| II   | EGFR-RAD51    | Lung Non-small Cell Carcinoma      | EGFR † | 7   | 55268008  | 55268008  | RAD51    | 15  | 55268008  | 55268008  |
| II   | LMNA-NTRK1    | Colorectal Adenocarcinoma          | LMNA   | 1   | 156084498 | 156108548 | NTRK1 †  | 1   | 156844363 | 156851434 |
| II   | LMNA-NTRK1    | Sarcoma                            | LMNA   | 1   | 156084498 | 156108548 | NTRK1 †  | 1   | 156844363 | 156851434 |
| II   | TFG-ROS1      | Inflammatory Myofibroblastic Tumor | TFG    | 3   | 100428269 | 100447702 | ROS1 †   | 6   | 117609463 | 117642557 |
| II   | KIF5B-RET     | Lung Adenocarcinoma                | KIF5B  | 10  | 32306071  | 32345359  | RET †    | 10  | 43609928  | 43625799  |

| Tier | Fusion Name   | Tumor Type                              | Gene     | Chr | Start     | Stop      | Gene   | Chr | Start     | Stop      |
|------|---------------|-----------------------------------------|----------|-----|-----------|-----------|--------|-----|-----------|-----------|
| II   | AGK-BRAF      | Melanoma                                | AGK      | 7   | 141250989 | 141255367 | BRAF†  | 7   | 140434279 | 140494267 |
| I    | AKAP9-BRAF    | Thyroid Gland Papillary Carcinoma       | AKAP9    | 7   | 91570181  | 91625114  | BRAF†  | 7   | 140434279 | 140487384 |
| II   | KIAA1549-BRAF | Skin Melanoma                           | KIAA1549 | 7   | 138545885 | 138666064 | BRAF†  | 7   | 140434279 | 140487384 |
| II   | PAPSS1-BRAF   | Melanoma                                | PAPSS1   | 4   | 108603171 | 108641608 | BRAF†  | 7   | 140434279 | 140487384 |
| II   | PPFIBP2-BRAF  | Skin Melanoma                           | PPFIBP2  | 11  | 7535001   | 7586998   | BRAF†  | 7   | 140434279 | 140481493 |
| II   | TRIM24-BRAF   | Melanoma                                | TRIM24   | 7   | 138145079 | 138239711 | BRAF†  | 7   | 140434279 | 140487384 |
| II   | TRIM24-BRAF   | Skin Melanoma                           | TRIM24   | 7   | 138145079 | 138239711 | BRAF†  | 7   | 140434279 | 140487384 |
| II   | ZKSCAN1-BRAF  | Melanoma                                | ZKSCAN1  | 7   | 99613222  | 99627575  | BRAF†  | 7   | 140434279 | 140482957 |
| II   | BRAF-CUL1     | Ovarian Serous Carcinoma                | BRAF†    | 7   | 140434279 | 140487384 | CUL1   | 7   | 148395737 | 148457588 |
| I    | KIAA1549-BRAF | Pediatric Low-grade Glioma (PLGG)       | KIAA1549 | 7   | 138545885 | 138666064 | BRAF†  | 7   | 140434279 | 140487384 |
| I    | KIAA1549-BRAF | Pilocytic Astrocytoma                   | KIAA1549 | 7   | 138545885 | 138666064 | BRAF†  | 7   | 140434279 | 140487384 |
| II   | KIAA1549-BRAF | Sarcoma                                 | KIAA1549 | 7   | 138545885 | 138666064 | BRAF†  | 7   | 140434279 | 140487384 |
| I    | CBFB-MYH11    | Acute Myeloid Leukemia                  | CBFB†    | 16  | 67063148  | 67116211  | MYH11  | 16  | 15797029  | 15820911  |
| II   | MEF2D-CSF1R   | Acute Lymphoblastic Leukemia            | MEF2D    | 1   | 156446804 | 156470620 | CSF1R† | 5   | 149433787 | 149441412 |
| I    | ETV6-NTRK3    | Cancer                                  | ETV6†    | 12  | 11802788  | 12022903  | NTRK3† | 15  | 88483984  | 88418230  |
| I    | ETV6-NTRK3    | Congenital Fibrosarcoma                 | ETV6†    | 12  | 11802788  | 12022903  | NTRK3† | 15  | 88483984  | 88418230  |
| I    | ETV6-NTRK3    | Thyroid Gland Papillary Carcinoma       | ETV6†    | 12  | 11802788  | 12022903  | NTRK3† | 15  | 88483984  | 88418230  |
| II   | ETV6-NTRK3    | Acute Myeloid Leukemia                  | ETV6†    | 12  | 11802788  | 12022903  | NTRK3† | 15  | 88483984  | 88418230  |
| II   | ETV6-NTRK3    | B-cell Adult Acute Lymphocytic Leukemia | ETV6†    | 12  | 11802788  | 12022903  | NTRK3† | 15  | 88483984  | 88418230  |
| II   | ETV6-NTRK3    | Breast Secretory Carcinoma              | ETV6†    | 12  | 11802788  | 12022903  | NTRK3† | 15  | 88483984  | 88418230  |
| II   | ETV6-NTRK3    | Pediatric B-lymphoblastic Leukemia      | ETV6†    | 12  | 11802788  | 12022903  | NTRK3† | 15  | 88483984  | 88418230  |

|    |                |                                                                                                 |           |    |           |           |          |    |           |           |
|----|----------------|-------------------------------------------------------------------------------------------------|-----------|----|-----------|-----------|----------|----|-----------|-----------|
| II | ETV6-NTRK3     | Salivary Gland Carcinoma                                                                        | ETV6 †    | 12 | 11802788  | 12022903  | NTRK3 †  | 15 | 88483984  | 88418230  |
| II | EWSR1-DDIT3    | Myxoid Liposarcoma                                                                              | EWSR1 †   | 22 | 29664307  | 29687588  | DDIT3    | 12 | 57910376  | 57911536  |
| I  | EWSR1-ERG      | Ewing Sarcoma                                                                                   | EWSR1 †   | 22 | 29664007  | 29683123  | ERG †    | 21 | 39751949  | 39755845  |
| I  | EWSR1-FLI1     | Ewing Sarcoma Of Bone                                                                           | EWSR1 †   | 22 | 29664307  | 29688158  | FLI1     | 11 | 128638013 | 128683162 |
| I  | EWSR1-FLI1     | Ewing Sarcoma                                                                                   | EWSR1 †   | 22 | 29664007  | 29683123  | FLI1     | 11 | 128651853 | 128683162 |
| I  | TMPRSS2-ERG    | Prostate Carcinoma                                                                              | TMPRSS2 † | 21 | 42879877  | 42879992  | ERG †    | 21 | 39751949  | 39817544  |
| I  | FGFR2-AHCYL1   | Cholangiocarcinoma                                                                              | FGFR2 †   | 10 | 123239371 | 123357917 | AHCYL1   | 1  | 110554984 | 110566357 |
| I  | FGFR2-BICC1    | Cholangiocarcinoma                                                                              | FGFR2 †   | 10 | 123239371 | 123357917 | BICC1    | 10 | 60461834  | 60591195  |
| II | FGFR2-BICC1    | Endometrial Cancer                                                                              | FGFR2 †   | 10 | 123239371 | 123357917 | BICC1    | 10 | 60461834  | 60591195  |
| II | FGFR2-BICC1    | Urothelial Carcinoma                                                                            | FGFR2 †   | 10 | 123239371 | 123357917 | BICC1    | 10 | 60461834  | 60591195  |
| II | FGFR2-MGEA5    | Cholangiocarcinoma                                                                              | FGFR2 †   | 10 | 123243212 | 123357917 | MGEA5    | 10 | 103544209 | 103552700 |
| II | FGFR2-TACC3    | Cholangiocarcinoma                                                                              | FGFR2 †   | 4  | 123243212 | 123357598 | TACC3    | 4  | 1723266   | 1741505   |
| II | FGFR3-BAIAP2L1 | Bladder Carcinoma                                                                               | FGFR3 †   | 4  | 1795039   | 1810599   | BAIAP2L1 | 7  | 97991744  | 97920963  |
| I  | FGFR3-TACC3    | Cancer                                                                                          | FGFR3 †   | 4  | 1795039   | 1808661   | TACC3    | 4  | 1741429   | 1746898   |
| I  | FGFR3-TACC3    | Urothelial Carcinoma                                                                            | FGFR3 †   | 4  | 1795039   | 1808661   | TACC3    | 4  | 1741429   | 1746898   |
| II | EBF1-PDGFRB    | Acute Lymphoblastic Leukemia                                                                    | EBF1      | 5  | 158134987 | 158526769 | PDGFRB † | 5  | 149493400 | 149505140 |
| II | EBF1-PDGFRB    | B-lymphoblastic Leukemia/lymphoma, BCR-ABL1 like                                                | EBF1      | 5  | 158134987 | 158526769 | PDGFRB † | 5  | 149493400 | 149505140 |
| II | EBF1-PDGFRB    | Childhood B-cell Acute Lymphoblastic Leukemia                                                   | EBF1      | 5  | 158134987 | 158526769 | PDGFRB † | 5  | 149493400 | 149505140 |
| II | EBF1-PDGFRB    | Pediatric B-lymphoblastic Leukemia                                                              | EBF1      | 5  | 158134987 | 158526769 | PDGFRB † | 5  | 149493400 | 149505140 |
| I  | FIP1L1-PDGFRB  | Myeloid And Lymphoid Neoplasms With Eosinophilia And Abnormalities Of PDGFRA, PDGFRB, And FGFR1 | FIP1L1    | 4  | 54243812  | 54294350  | PDGFRA † | 4  | 55141008  | 55164414  |

|    |               |                        |        |   |          |          |          |   |          |          |
|----|---------------|------------------------|--------|---|----------|----------|----------|---|----------|----------|
| II | FIP1L1-PDGFRA | Acute Myeloid Leukemia | FIP1L1 | 4 | 54243812 | 54294350 | PDGFRA † | 4 | 55141008 | 55164414 |
|----|---------------|------------------------|--------|---|----------|----------|----------|---|----------|----------|

**S3 Fig.** Gene list for single-nucleotide variant, insertions and deletion, copy number variation, and fusion.
