# Supplementary material for: Validation and Clinical Application of ONCOaccuPanel for Targeted Next-Generation Sequencing of Solid Tumors
Source: PubMed Central journal article supplement — Cancer Res Treat. 2022 Nov 25;55(2):429–41. doi: 10.4143/crt.2022.891 (PMC10101781; doi:10.4143/crt.2022.891), 2023-04
Supplement: crt-2022-891-Supplementary-Table-1.pdf [file crt-2022-891-Supplementary-Table-1.pdf]

**S1 Table.** Samples used for validation process

| Case No. | Tumor type           | Checklist for validation                                                                                                                      | Total reads | Total bases (Mb) | Mapped bases (Mb) | Mapped bases (%) | On-target bases (Mb) | On-target (%) | Duplicated ratio | On-target coverage | Note    |
|----------|----------------------|-----------------------------------------------------------------------------------------------------------------------------------------------|-------------|------------------|-------------------|------------------|----------------------|---------------|------------------|--------------------|---------|
| 1        | MUO                  | <i>APC</i> p.K1245*, <i>APC</i> p.Q1303*, <i>ATM</i> p.I1688T, <i>TP53</i> p.T125K, <i>KRAS</i> Amp                                           | 6,027,014   | 455              | 450               | 98.96            | 304                  | 73            | 27.14            | 185.28             | DIN 2.1 |
| 2        | Skin cancer          | MSI-high                                                                                                                                      | 11,198,598  | 845              | 840               | 99.34            | 521                  | 69.28         | 11.69            | 402.3              |         |
| 3        | Ovary cancer         | <i>KRAS</i> G12D, <i>ATM</i> p.M1087I, <i>TP53</i> p.C238_S240del, <i>ALK</i> p.A348T                                                         | 11,957,256  | 902              | 895               | 99.13            | 567                  | 69.48         | 15.89            | 413.21             |         |
| 4        | MUO                  | <i>NRAS</i> Q61R, <i>TP53</i> p.H179Y, <i>TP53</i> p.W53fs, <i>FLT3</i> p.G64R, <i>PTCHI</i> p.A741V, <i>SPOP</i> p.S330P, <i>SMARCB1</i> Amp | 11,719,094  | 890              | 884               | 99.42            | 554                  | 69.99         | 13.32            | 419.86             |         |
| 5        | Ovary cancer         | <i>HER2</i> amplification                                                                                                                     | 11,099,854  | 838              | 832               | 99.3             | 519                  | 69.3          | 17.45            | 369.1              |         |
| 6        | Lung cancer          | <i>EGFR</i> L858R                                                                                                                             | 11,478,364  | 867              | 860               | 99.24            | 486                  | 63.4          | 12.02            | 372.6              |         |
| 7        | Lung cancer          | <i>EGFR</i> (p.E746_A750del), <i>EGFR</i> (p.T790M)                                                                                           | 10,925,502  | 825              | 817               | 99.1             | 466                  | 64.1          | 8.96             | 372.4              |         |
| 8        | Head and neck cancer | <i>HER2</i> amplification                                                                                                                     | 11,389,586  | 860              | 853               | 99.26            | 489                  | 64.47         | 9.72             | 387.63             |         |
| 9        | Lung cancer          | <i>HER2</i> amplification                                                                                                                     | 9,429,506   | 712              | 707               | 99.35            | 424                  | 67.11         | 11.61            | 327.42             |         |
| 10       | Endometrial cancer   | MSI-high                                                                                                                                      | 9,743,030   | 735              | 730               | 99.29            | 419                  | 64.27         | 10.29            | 327.47             |         |
| 11       | Endometrial cancer   | MSI-high                                                                                                                                      | 11,784,268  | 889              | 879               | 98.86            | 468                  | 59.98         | 9.37             | 370.39             |         |

|    |             |                              |            |     |     |       |     |       |       |        |
|----|-------------|------------------------------|------------|-----|-----|-------|-----|-------|-------|--------|
|    | cancer      |                              |            |     |     |       |     |       |       |        |
| 12 | Lung cancer | <i>EGFR</i> L858R            | 11,733,176 | 886 | 880 | 99.34 | 489 | 62.4  | 11.11 | 377.48 |
| 13 | Lung cancer | <i>EGFR</i> (p.E746_A750del) | 12,268,028 | 926 | 920 | 99.41 | 515 | 62.97 | 9.15  | 409.94 |
| 14 | Lung cancer | <i>ALK</i> fusion            | 12,184,050 | 920 | 912 | 99.16 | 494 | 60.86 | 8.45  | 395.47 |
| 15 | Thyroid     | <i>BRAF</i> V600E            | 11,868,314 | 896 | 891 | 99.47 | 499 | 63.42 | 14.6  | 371    |
|    | cancer      |                              |            |     |     |       |     |       |       |        |
| 16 | Lung cancer | <i>ROS1</i> fusion           | 11,706,980 | 883 | 877 | 99.31 | 546 | 69.29 | 12.63 | 417    |

---

DIN, DNA integrity number; MSI, microsatellite instability; MUO, metastasis of unknown origin.
