# Supplementary material for: Validation and Clinical Application of ONCOaccuPanel for Targeted Next-Generation Sequencing of Solid Tumors
Source: PubMed Central journal article supplement — Cancer Res Treat. 2022 Nov 25;55(2):429–41. doi: 10.4143/crt.2022.891 (PMC10101781; doi:10.4143/crt.2022.891), 2023-04
Supplement: crt-2022-891-Supplementary-Table-3.pdf [file crt-2022-891-Supplementary-Table-3.pdf]

**S4 Table.** Coverage information of ONCOaccuPanel

| Coverage and GC contents for all genes |          |             | Coverage and GC contents for all exons with coverage less than 100× |      |                 |               |                          |
|----------------------------------------|----------|-------------|---------------------------------------------------------------------|------|-----------------|---------------|--------------------------|
| Gene                                   | Coverage | GC contents | Gene                                                                | Exon | Transcript ID   | Mean coverage | GC contents % (per Exon) |
| <i>ERRFI1</i>                          | 260.17   | 47.12       | <i>PIK3CD</i>                                                       | 12   | ENST00000377346 | 46.54         | 60.78                    |
| <i>PIK3CD</i>                          | 231.34   | 60.77       | <i>MPL</i>                                                          | 1    | ENST00000372470 | 52.18         | 62.81                    |
| <i>MTOR</i>                            | 220.49   | 53.08       | <i>PTCH2</i>                                                        | 22   | ENST00000372192 | 44.14         | 56.04                    |
| <i>SDHB</i>                            | 211.87   | 49.79       | <i>PTCH2</i>                                                        | 6    | ENST00000372192 | 63.11         | 65.82                    |
| <i>ARID1A</i>                          | 226.07   | 59.95       | <i>PTCH2</i>                                                        | 1    | ENST00000372192 | 8.61          | 71.21                    |
| <i>RSPO1</i>                           | 149.15   | 60.56       | <i>NTRK1</i>                                                        | 1    | ENST00000524377 | 47.72         | 73.89                    |
| <i>MPL</i>                             | 212.8    | 59.23       | <i>NTRK1</i>                                                        | 3    | ENST00000524377 | 54.68         | 58.33                    |
| <i>PTCH2</i>                           | 113.46   | 60.86       | <i>RET</i>                                                          | 1    | ENST00000355710 | 6.14          | 75.00                    |
| <i>CDKN2C</i>                          | 223.17   | 52.53       | <i>IGF2</i>                                                         | 5    | ENST00000434045 | 40.18         | 65.74                    |
| <i>JAK1</i>                            | 239.72   | 47.47       | <i>MEN1</i>                                                         | 6    | ENST00000337652 | 67.00         | 63.64                    |
| <i>FUBP1</i>                           | 213.02   | 47.87       | <i>FGF19</i>                                                        | 1    | ENST00000294312 | 11.13         | 74.60                    |
| <i>DPYD</i>                            | 223.81   | 44.89       | <i>FGF4</i>                                                         | 1    | ENST00000168712 | 30.63         | 76.86                    |
| <i>MFSD14A</i>                         | 227.15   | 43.86       | <i>SDHD</i>                                                         | 1    | ENST00000375549 | 19.41         | 60.91                    |
| <i>NRAS</i>                            | 272.11   | 44.50       | <i>TMPRSS13</i>                                                     | 2    | ENST00000524993 | 13.05         | 67.92                    |
| <i>NOTCH2</i>                          | 206.98   | 53.84       | <i>PTPN11</i>                                                       | 1    | ENST00000351677 | 0.59          | 70.89                    |
| <i>NOTCH2NL</i>                        | 1124.81  | 54.68       | <i>FLT3</i>                                                         | 1    | ENST00000241453 | 2.16          | 81.90                    |
| <i>MCL1</i>                            | 434.06   | 60.10       | <i>AKT1</i>                                                         | 15   | ENST00000349310 | 61.80         | 57.40                    |
| <i>SPRR3</i>                           | 184.04   | 58.75       | <i>LTK</i>                                                          | 2    | ENST00000263800 | 46.96         | 67.36                    |

|                |        |       |                |    |                 |       |       |
|----------------|--------|-------|----------------|----|-----------------|-------|-------|
| <i>ASH1L</i>   | 234.47 | 52.92 | <i>IDH2</i>    | 1  | ENST00000330062 | 8.75  | 76.27 |
| <i>NTRK1</i>   | 208.7  | 62.99 | <i>AXINI</i>   | 8  | ENST00000262320 | 17.93 | 65.80 |
| <i>SDHC</i>    | 245.21 | 51.08 | <i>TSC2</i>    | 4  | ENST00000219476 | 29.64 | 70.27 |
| <i>DDR2</i>    | 297.12 | 50.43 | <i>TSC2</i>    | 33 | ENST00000219476 | 50.16 | 66.39 |
| <i>ABL2</i>    | 316.2  | 52.51 | <i>CREBBP</i>  | 14 | ENST00000262367 | 40.53 | 64.75 |
| <i>UBE2T</i>   | 218.8  | 45.45 | <i>CDH1</i>    | 1  | ENST00000261769 | 26.35 | 78.70 |
| <i>MDM4</i>    | 250.42 | 42.35 | <i>FANCA</i>   | 43 | ENST00000389301 | 79.69 | 59.77 |
| <i>H3F3A</i>   | 196.31 | 48.10 | <i>FANCA</i>   | 40 | ENST00000389301 | 22.48 | 64.47 |
| <i>PARP1</i>   | 227.18 | 51.67 | <i>FANCA</i>   | 1  | ENST00000389301 | 29.95 | 76.92 |
| <i>ARV1</i>    | 164.17 | 38.22 | <i>AURKB</i>   | 2  | ENST00000585124 | 17.77 | 59.02 |
| <i>FMN2</i>    | 80.8   | 69.58 | <i>MAP2K4</i>  | 1  | ENST00000353533 | 13.09 | 78.09 |
| <i>AKT3</i>    | 201.28 | 40.29 | <i>CENPV</i>   | 1  | ENST00000299736 | 0.34  | 78.33 |
| <i>MYCN</i>    | 225.36 | 67.04 | <i>NF1</i>     | 1  | ENST00000358273 | 8.27  | 75.00 |
| <i>GEN1</i>    | 226.34 | 38.45 | <i>ERBB2</i>   | 1  | ENST00000269571 | 6.50  | 76.52 |
| <i>DNMT3A</i>  | 188.3  | 60.21 | <i>ETV4</i>    | 6  | ENST00000319349 | 59.00 | 63.78 |
| <i>ALK</i>     | 187.13 | 58.16 | <i>ETV4</i>    | 3  | ENST00000319349 | 45.85 | 67.02 |
| <i>SULT6B1</i> | 139.96 | 31.86 | <i>ETV4</i>    | 2  | ENST00000319349 | 21.66 | 70.27 |
| <i>CEBPZ</i>   | 125.88 | 36.67 | <i>MAP2K2</i>  | 10 | ENST00000262948 | 43.72 | 60.87 |
| <i>MSH2</i>    | 210.8  | 41.07 | <i>MAP2K2</i>  | 9  | ENST00000262948 | 47.13 | 53.23 |
| <i>MSH6</i>    | 247.42 | 44.60 | <i>SMARCA4</i> | 33 | ENST00000344626 | 46.20 | 54.17 |
| <i>FANCL</i>   | 212.66 | 41.27 | <i>NOTCH3</i>  | 24 | ENST00000263388 | 12.41 | 77.03 |
| <i>XPO1</i>    | 236.54 | 37.06 | <i>NOTCH3</i>  | 18 | ENST00000263388 | 35.42 | 68.81 |
| <i>PCBP1</i>   | 42.02  | 63.75 | <i>NOTCH3</i>  | 15 | ENST00000263388 | 21.20 | 69.30 |

|                |        |       |                |    |                 |       |       |
|----------------|--------|-------|----------------|----|-----------------|-------|-------|
| <i>LIPT1</i>   | 159.97 | 40.83 | <i>BRD4</i>    | 14 | ENST00000263377 | 26.88 | 69.39 |
| <i>LRP1B</i>   | 215.5  | 42.81 | <i>BRD4</i>    | 13 | ENST00000263377 | 14.96 | 68.60 |
| <i>ACVR2A</i>  | 141.23 | 39.67 | <i>BRD4</i>    | 5  | ENST00000263377 | 33.85 | 66.21 |
| <i>COBLL1</i>  | 91.84  | 44.58 | <i>JAK3</i>    | 3  | ENST00000458235 | 69.23 | 61.29 |
| <i>DYNC1I2</i> | 137.5  | 44.92 | <i>PIK3R2</i>  | 6  | ENST00000222254 | 9.85  | 80.98 |
| <i>NFE2L2</i>  | 196.85 | 42.70 | <i>CCNE1</i>   | 2  | ENST00000262643 | 28.66 | 74.47 |
| <i>SF3B1</i>   | 170.74 | 42.91 | <i>AXL</i>     | 1  | ENST00000301178 | 10.04 | 72.19 |
| <i>IDH1</i>    | 229.75 | 43.81 | <i>AXL</i>     | 8  | ENST00000301178 | 75.03 | 65.71 |
| <i>ERBB4</i>   | 218.72 | 46.97 | <i>ERCC2</i>   | 12 | ENST00000391945 | 61.91 | 57.14 |
| <i>BARD1</i>   | 241.44 | 44.30 | <i>DNMT3A</i>  | 2  | ENST00000264709 | 12.69 | 75.76 |
| <i>IRS1</i>    | 19.65  | 65.83 | <i>PCBP1</i>   | 1  | ENST00000303577 | 40.53 | 63.75 |
| <i>FANCD2</i>  | 273.36 | 44.05 | <i>IRS1</i>    | 1  | ENST00000305123 | 20.80 | 65.83 |
| <i>VHL</i>     | 223.34 | 59.47 | <i>ASXL1</i>   | 1  | ENST00000375687 | 15.74 | 73.17 |
| <i>PPARG</i>   | 264.62 | 46.42 | <i>RUNX1</i>   | 6  | ENST00000300305 | 46.40 | 61.46 |
| <i>RAF1</i>    | 244.5  | 48.89 | <i>TMPRSS2</i> | 14 | ENST00000398585 | 71.04 | 50.00 |
| <i>MLH1</i>    | 253.96 | 46.36 | <i>TMPRSS2</i> | 1  | ENST00000398585 | 19.59 | 78.45 |
| <i>CTNNB1</i>  | 254.73 | 47.70 | <i>ZNRF3</i>   | 1  | ENST00000544604 | 26.66 | 70.00 |
| <i>SETD2</i>   | 295.75 | 43.06 | <i>EWSR1</i>   | 1  | ENST00000414183 | 10.36 | 56.00 |
| <i>RHOA</i>    | 202.17 | 50.00 | <i>EWSR1</i>   | 17 | ENST00000414183 | 31.52 | 62.45 |
| <i>DOCK3</i>   | 138.7  | 63.86 | <i>GATA2</i>   | 2  | ENST00000341105 | 36.97 | 70.73 |
| <i>BAP1</i>    | 192.98 | 59.31 | <i>ETV5</i>    | 7  | ENST00000306376 | 60.72 | 59.72 |
| <i>PBRM1</i>   | 228.04 | 44.07 | <i>FGFR3</i>   | 1  | ENST00000260795 | 20.26 | 78.81 |
| <i>DNAH12</i>  | 88.81  | 29.63 | <i>FGFR3</i>   | 3  | ENST00000260795 | 42.15 | 62.12 |

|                 |        |       |                |    |                 |       |       |
|-----------------|--------|-------|----------------|----|-----------------|-------|-------|
| <i>MITF</i>     | 234.56 | 51.58 | <i>RGS12</i>   | 17 | ENST00000344733 | 40.52 | 70.83 |
| <i>EPHA3</i>    | 223.79 | 47.00 | <i>SDHA</i>    | 1  | ENST00000264932 | 15.03 | 76.47 |
| <i>GATA2</i>    | 114.76 | 65.02 | <i>TERT</i>    | 1  | ENST00000310581 | 32.20 | 79.06 |
| <i>PIK3CB</i>   | 258    | 40.96 | <i>MAP3K1</i>  | 1  | ENST00000399503 | 11.15 | 79.05 |
| <i>FOXL2</i>    | 178.96 | 72.60 | <i>PCDHB16</i> | 1  | ENST00000361016 | 5.84  | 71.67 |
| <i>ATR</i>      | 261.3  | 40.04 | <i>KCTD16</i>  | 3  | ENST00000507359 | 60.24 | 45.00 |
| <i>PIK3CA</i>   | 253.92 | 38.96 | <i>CSF1R</i>   | 11 | ENST00000286301 | 48.63 | 56.90 |
| <i>FXR1</i>     | 156.85 | 38.64 | <i>CSF1R</i>   | 2  | ENST00000286301 | 65.77 | 67.59 |
| <i>SOX2</i>     | 460.38 | 66.26 | <i>PDGFRB</i>  | 22 | ENST00000261799 | 53.78 | 61.80 |
| <i>ABCC5</i>    | 111.52 | 56.78 | <i>FGFR4</i>   | 2  | ENST00000292408 | 36.19 | 62.50 |
| <i>ETV5</i>     | 176.19 | 53.99 | <i>FLT4</i>    | 1  | ENST00000261937 | 15.75 | 76.80 |
| <i>ZNF141</i>   | 180.63 | 42.08 | <i>DDR1</i>    | 6  | ENST00000324771 | 43.61 | 66.81 |
| <i>CRIPAK</i>   | 519.67 | 69.58 | <i>DDR1</i>    | 20 | ENST00000324771 | 68.26 | 55.69 |
| <i>FGFR3</i>    | 234.23 | 65.86 | <i>NOTCH4</i>  | 17 | ENST00000375023 | 68.83 | 61.04 |
| <i>RGS12</i>    | 46.76  | 70.83 | <i>NOTCH4</i>  | 15 | ENST00000375023 | 58.05 | 65.25 |
| <i>CPEB2</i>    | 179.38 | 48.33 | <i>NOTCH4</i>  | 8  | ENST00000375023 | 60.26 | 61.54 |
| <i>FGFBP1</i>   | 136.03 | 51.15 | <i>NOTCH4</i>  | 3  | ENST00000375023 | 59.01 | 62.84 |
| <i>PDGFRA</i>   | 238.59 | 47.63 | <i>FANCE</i>   | 1  | ENST00000229769 | 2.27  | 79.85 |
| <i>KIT</i>      | 228.89 | 45.34 | <i>CCND3</i>   | 5  | ENST00000372991 | 26.35 | 65.20 |
| <i>KDR</i>      | 234.03 | 47.47 | <i>MAP3K4</i>  | 1  | ENST00000392142 | 19.90 | 74.62 |
| <i>CLOCK</i>    | 126.32 | 33.33 | <i>PMS2</i>    | 15 | ENST00000265849 | 21.17 | 46.57 |
| <i>ABRAXAS1</i> | 223.79 | 40.46 | <i>HGF</i>     | 1  | ENST00000222390 | 62.48 | 61.84 |
| <i>TET2</i>     | 261.64 | 45.30 | <i>EPHB4</i>   | 17 | ENST00000358173 | 49.96 | 64.47 |

|                |        |       |               |    |                 |       |       |
|----------------|--------|-------|---------------|----|-----------------|-------|-------|
| <i>FBXW7</i>   | 240    | 44.23 | <i>EPHB4</i>  | 15 | ENST00000358173 | 63.42 | 64.43 |
| <i>SDHA</i>    | 193.62 | 56.09 | <i>RASA4</i>  | 11 | ENST00000262940 | 26.17 | 52.31 |
| <i>TERT</i>    | 172.46 | 66.41 | <i>SMO</i>    | 1  | ENST00000249373 | 36.12 | 77.43 |
| <i>RICTOR</i>  | 226.98 | 40.43 | <i>BRAF</i>   | 1  | ENST00000288602 | 27.25 | 77.13 |
| <i>MAP3K1</i>  | 173.24 | 48.44 | <i>FGFR1</i>  | 19 | ENST00000425967 | 48.05 | 66.12 |
| <i>PIK3R1</i>  | 190.49 | 42.20 | <i>BRD3</i>   | 9  | ENST00000303407 | 51.63 | 57.20 |
| <i>APC</i>     | 260.62 | 41.27 | <i>BRD3</i>   | 5  | ENST00000303407 | 43.32 | 67.44 |
| <i>RAD50</i>   | 199.7  | 38.57 | <i>NOTCH1</i> | 1  | ENST00000277541 | 0.65  | 81.75 |
| <i>WDR55</i>   | 107.85 | 55.42 | <i>ARAF</i>   | 13 | ENST00000377045 | 54.57 | 58.82 |
| <i>PCDHB16</i> | 7.14   | 71.67 | <i>ATRX</i>   | 1  | ENST00000373344 | 34.09 | 62.20 |
| <i>KCTD16</i>  | 58.5   | 45.00 |               |    |                 |       |       |
| <i>CSF1R</i>   | 166.45 | 58.06 |               |    |                 |       |       |
| <i>PDGFRB</i>  | 161.59 | 58.57 |               |    |                 |       |       |
| <i>FGFR4</i>   | 219.97 | 63.49 |               |    |                 |       |       |
| <i>FLT4</i>    | 199.36 | 62.75 |               |    |                 |       |       |
| <i>DDR1</i>    | 121.12 | 60.59 |               |    |                 |       |       |
| <i>NOTCH4</i>  | 104.82 | 63.04 |               |    |                 |       |       |
| <i>BRD2</i>    | 148.78 | 55.55 |               |    |                 |       |       |
| <i>FANCE</i>   | 133.63 | 60.35 |               |    |                 |       |       |
| <i>CDKN1A</i>  | 184.5  | 64.22 |               |    |                 |       |       |
| <i>CCND3</i>   | 82.71  | 63.38 |               |    |                 |       |       |
| <i>GTPBP2</i>  | 116.21 | 56.46 |               |    |                 |       |       |
| <i>PRIM2</i>   | 227.48 | 41.94 |               |    |                 |       |       |

|               |        |       |
|---------------|--------|-------|
| <i>SEC63</i>  | 167.75 | 38.51 |
| <i>MFSD4B</i> | 91.6   | 35.00 |
| <i>ROS1</i>   | 167.73 | 42.32 |
| <i>AKAP7</i>  | 66.06  | 34.53 |
| <i>ESR1</i>   | 166.63 | 57.58 |
| <i>ARID1B</i> | 165.49 | 60.07 |
| <i>SYNJ2</i>  | 159.57 | 69.66 |
| <i>MAP3K4</i> | 176.65 | 47.40 |
| <i>PMS2</i>   | 220.02 | 46.51 |
| <i>RAC1</i>   | 139.46 | 40.28 |
| <i>ETV1</i>   | 184.96 | 48.17 |
| <i>HDAC9</i>  | 216.41 | 50.09 |
| <i>EGFR</i>   | 236.9  | 54.45 |
| <i>TMEM60</i> | 160.55 | 42.08 |
| <i>HGF</i>    | 219.8  | 44.11 |
| <i>CDK6</i>   | 280.33 | 52.99 |
| <i>CASD1</i>  | 69.25  | 36.26 |
| <i>EPHB4</i>  | 201.17 | 62.77 |
| <i>AP1S1</i>  | 78.25  | 52.17 |
| <i>RASA4</i>  | 36.66  | 52.31 |
| <i>MET</i>    | 252.78 | 43.52 |
| <i>SMO</i>    | 181.63 | 63.50 |
| <i>BRAF</i>   | 264.88 | 45.96 |

|               |        |       |
|---------------|--------|-------|
| <i>EZH2</i>   | 278.05 | 44.40 |
| <i>NOS3</i>   | 93.78  | 61.98 |
| <i>XRCC2</i>  | 307.44 | 41.94 |
| <i>DLC1</i>   | 180.47 | 57.50 |
| <i>FGFR1</i>  | 193.22 | 57.08 |
| <i>PCMTD1</i> | 300.58 | 36.34 |
| <i>PREX2</i>  | 121.07 | 58.77 |
| <i>STAU2</i>  | 165.01 | 38.64 |
| <i>IMPA1</i>  | 89.07  | 30.43 |
| <i>NBN</i>    | 228.43 | 39.18 |
| <i>PABPC1</i> | 69.59  | 45.63 |
| <i>RSPO2</i>  | 219.56 | 46.99 |
| <i>MYC</i>    | 309.56 | 58.61 |
| <i>EPPK1</i>  | 155.74 | 65.83 |
| <i>JAK2</i>   | 171.43 | 38.61 |
| <i>CD274</i>  | 173.48 | 44.24 |
| <i>MTAP</i>   | 128.3  | 48.58 |
| <i>CDKN2A</i> | 139.94 | 69.86 |
| <i>CDKN2B</i> | 129.45 | 71.17 |
| <i>FANCG</i>  | 160.06 | 57.52 |
| <i>GNAQ</i>   | 268.74 | 49.29 |
| <i>NTRK2</i>  | 223.34 | 50.31 |
| <i>SYK</i>    | 229.69 | 52.64 |

|                 |        |       |
|-----------------|--------|-------|
| <i>FANCC</i>    | 210.5  | 49.33 |
| <i>PTCH1</i>    | 204.7  | 56.29 |
| <i>KLF4</i>     | 117.99 | 59.39 |
| <i>ZFP37</i>    | 182.57 | 35.41 |
| <i>ABL1</i>     | 278.56 | 59.37 |
| <i>TSC1</i>     | 216.82 | 50.76 |
| <i>BRD3</i>     | 190.16 | 59.00 |
| <i>NOTCH1</i>   | 207.33 | 66.02 |
| <i>RET</i>      | 179.37 | 60.42 |
| <i>MAPK8</i>    | 228.25 | 42.76 |
| <i>RUFY2</i>    | 188.37 | 47.06 |
| <i>PTEN</i>     | 155.64 | 48.22 |
| <i>STAMBPL1</i> | 155.97 | 50.00 |
| <i>TCF7L2</i>   | 178.51 | 57.49 |
| <i>FGFR2</i>    | 220.48 | 50.52 |
| <i>FRG2B</i>    | 129.38 | 53.25 |
| <i>IFITM1</i>   | 221.65 | 54.22 |
| <i>IFITM3</i>   | 136.3  | 58.22 |
| <i>HRAS</i>     | 313.76 | 60.67 |
| <i>IGF2</i>     | 158.92 | 63.19 |
| <i>FANCF</i>    | 288.28 | 59.20 |
| <i>WT1</i>      | 134.57 | 61.69 |
| <i>CCDC73</i>   | 100.32 | 27.37 |



|                 |        |       |
|-----------------|--------|-------|
| <i>MEN1</i>     | 197.1  | 63.03 |
| <i>CCND1</i>    | 240.39 | 62.34 |
| <i>FGF19</i>    | 123.32 | 64.90 |
| <i>FGF4</i>     | 101.34 | 69.24 |
| <i>MRE11</i>    | 221.33 | 39.84 |
| <i>ATM</i>      | 226.87 | 38.68 |
| <i>SDHD</i>     | 225.8  | 52.25 |
| <i>TMPRSS13</i> | 15.73  | 67.92 |
| <i>CD3G</i>     | 166.65 | 39.66 |
| <i>KMT2A</i>    | 256.86 | 48.16 |
| <i>DPAGT1</i>   | 173.76 | 42.35 |
| <i>CBL</i>      | 157.98 | 45.83 |
| <i>CCND2</i>    | 227.77 | 57.62 |
| <i>TAS2R19</i>  | 209.91 | 40.42 |
| <i>TAS2R31</i>  | 206.45 | 38.33 |
| <i>ETV6</i>     | 239.22 | 51.29 |
| <i>CDKN1B</i>   | 237.43 | 51.29 |
| <i>KRAS</i>     | 278.24 | 36.52 |
| <i>ARID2</i>    | 263.21 | 43.99 |
| <i>ERBB3</i>    | 226.37 | 54.16 |
| <i>MYO1A</i>    | 190.34 | 54.44 |
| <i>CDK4</i>     | 239.42 | 53.81 |
| <i>MDM2</i>     | 225.85 | 41.37 |

|               |        |       |
|---------------|--------|-------|
| <i>MVK</i>    | 85.72  | 67.31 |
| <i>PTPN11</i> | 233.74 | 46.25 |
| <i>HNF1A</i>  | 190.05 | 64.99 |
| <i>POLE</i>   | 204.18 | 56.31 |
| <i>FLT3</i>   | 219.04 | 44.18 |
| <i>FLT1</i>   | 217.98 | 45.88 |
| <i>BRCA2</i>  | 239.86 | 35.74 |
| <i>RBI</i>    | 214.79 | 40.55 |
| <i>EBPL</i>   | 123.42 | 51.42 |
| <i>CKAP2</i>  | 146.53 | 36.90 |
| <i>FBXL3</i>  | 136.98 | 38.75 |
| <i>NFKBIA</i> | 223.12 | 57.95 |
| <i>NKX2-1</i> | 148.39 | 70.82 |
| <i>FANCM</i>  | 214.12 | 37.87 |
| <i>MAX</i>    | 153.46 | 49.57 |
| <i>AKT1</i>   | 174.31 | 59.06 |
| <i>OR4M2</i>  | 193.61 | 50.42 |
| <i>NIPA2</i>  | 141.85 | 43.90 |
| <i>NUTM1</i>  | 202.21 | 55.20 |
| <i>KNSTRN</i> | 143.11 | 58.33 |
| <i>RAD51</i>  | 185.67 | 47.31 |
| <i>LTK</i>    | 145.75 | 64.89 |
| <i>MAP2K1</i> | 210.44 | 53.92 |

|                 |        |       |
|-----------------|--------|-------|
| <i>NTRK3</i>    | 185.04 | 54.62 |
| <i>FANCI</i>    | 235.35 | 43.29 |
| <i>IDH2</i>     | 195.08 | 59.73 |
| <i>IGF1R</i>    | 239.67 | 54.83 |
| <i>AXIN1</i>    | 207.7  | 62.36 |
| <i>TPSD1</i>    | 116.6  | 64.32 |
| <i>TSC2</i>     | 219.81 | 60.17 |
| <i>SLX4</i>     | 226.87 | 59.03 |
| <i>CREBBP</i>   | 169.9  | 56.95 |
| <i>ERCC4</i>    | 242.46 | 45.23 |
| <i>PALB2</i>    | 260.28 | 43.10 |
| <i>INO80E</i>   | 126.89 | 69.17 |
| <i>MAPK3</i>    | 190.21 | 59.18 |
| <i>CBFB</i>     | 207.54 | 55.19 |
| <i>CDH1</i>     | 234.06 | 52.31 |
| <i>ADAMTS18</i> | 135.63 | 41.86 |
| <i>NUDT7</i>    | 155.03 | 39.17 |
| <i>FANCA</i>    | 194.94 | 55.15 |
| <i>TP53</i>     | 137.58 | 57.17 |
| <i>AURKB</i>    | 181.37 | 56.22 |
| <i>MAP2K4</i>   | 152.78 | 46.15 |
| <i>CENPV</i>    | 0      | 78.33 |
| <i>FLCN</i>     | 184.71 | 59.73 |

|                |        |       |
|----------------|--------|-------|
| <i>NF1</i>     | 239.7  | 43.02 |
| <i>RAD51D</i>  | 215.61 | 60.07 |
| <i>CDK12</i>   | 255.11 | 50.46 |
| <i>ERBB2</i>   | 175.82 | 61.05 |
| <i>RARA</i>    | 237.33 | 62.43 |
| <i>TOP2A</i>   | 239.73 | 39.62 |
| <i>KRT32</i>   | 115.95 | 64.47 |
| <i>STAT3</i>   | 187.54 | 48.83 |
| <i>BRCA1</i>   | 259.66 | 41.46 |
| <i>ETV4</i>    | 127.37 | 60.94 |
| <i>SPOP</i>    | 245.17 | 47.88 |
| <i>RNF43</i>   | 159.43 | 60.40 |
| <i>RAD51C</i>  | 205.11 | 44.66 |
| <i>BRIP1</i>   | 236.98 | 38.56 |
| <i>SOX9</i>    | 317.91 | 68.06 |
| <i>CBX4</i>    | 323.09 | 60.00 |
| <i>RBBP8</i>   | 119.6  | 34.17 |
| <i>SMAD2</i>   | 182.29 | 44.24 |
| <i>SMAD4</i>   | 182.44 | 46.78 |
| <i>MADCAM1</i> | 290    | 70.91 |
| <i>GRIN3B</i>  | 153.59 | 65.83 |
| <i>STK11</i>   | 150.88 | 64.17 |
| <i>DOT1L</i>   | 238.52 | 64.01 |

|                |        |       |
|----------------|--------|-------|
| <i>GNAI1</i>   | 307.63 | 59.23 |
| <i>MAP2K2</i>  | 137.4  | 62.54 |
| <i>SMARCA4</i> | 253.5  | 61.45 |
| <i>ZNF563</i>  | 296.94 | 42.08 |
| <i>NOTCH3</i>  | 177.16 | 66.23 |
| <i>BRD4</i>    | 153.5  | 60.06 |
| <i>JAK3</i>    | 122.33 | 62.16 |
| <i>PIK3R2</i>  | 187.8  | 65.76 |
| <i>CCNE1</i>   | 220.28 | 49.35 |
| <i>CEBPA</i>   | 184.37 | 75.25 |
| <i>WDR87</i>   | 155.02 | 43.75 |
| <i>AKT2</i>    | 173.59 | 58.86 |
| <i>AXL</i>     | 178.21 | 60.50 |
| <i>CIC</i>     | 134.35 | 65.21 |
| <i>ERCC2</i>   | 166.02 | 60.40 |
| <i>BAX</i>     | 109.97 | 62.59 |
| <i>TEAD2</i>   | 115.43 | 60.92 |
| <i>PPP2R1A</i> | 105.18 | 63.16 |
| <i>AURKC</i>   | 202.5  | 56.22 |
| <i>AIBG</i>    | 105.09 | 63.75 |
| <i>SLC23A2</i> | 51.47  | 62.16 |
| <i>SSTR4</i>   | 307.87 | 66.67 |
| <i>ASXL1</i>   | 260.61 | 54.13 |

|                |        |       |
|----------------|--------|-------|
| <i>SRC</i>     | 259.85 | 62.94 |
| <i>NNAT</i>    | 325.54 | 63.00 |
| <i>TOP1</i>    | 279.81 | 44.75 |
| <i>ADNP</i>    | 223.62 | 47.50 |
| <i>AURKA</i>   | 290.59 | 44.62 |
| <i>GNAS</i>    | 322.92 | 53.84 |
| <i>CDH26</i>   | 107.22 | 35.83 |
| <i>RUNX1</i>   | 108.64 | 62.53 |
| <i>ERG</i>     | 127.81 | 53.26 |
| <i>TMPRSS2</i> | 152.4  | 55.45 |
| <i>U2AF1</i>   | 138.48 | 49.55 |
| <i>MAPK1</i>   | 174.37 | 46.90 |
| <i>SMARCB1</i> | 202.18 | 57.20 |
| <i>CHEK2</i>   | 155.68 | 45.21 |
| <i>ZNRF3</i>   | 202.25 | 63.83 |
| <i>EWSR1</i>   | 142.09 | 56.21 |
| <i>NF2</i>     | 158.26 | 52.38 |
| <i>PDGFB</i>   | 125.85 | 64.43 |
| <i>FANCB</i>   | 116.51 | 36.49 |
| <i>DDX3X</i>   | 120.3  | 46.25 |
| <i>ARAF</i>    | 104.07 | 59.83 |
| <i>AR</i>      | 127.37 | 58.20 |
| <i>MED12</i>   | 116.36 | 54.64 |

|             |        |       |
|-------------|--------|-------|
| <i>ATRX</i> | 126.44 | 38.30 |
| <i>BTK</i>  | 95.12  | 53.92 |

---
