# Supplementary material for: Validation and Clinical Application of ONCOaccuPanel for Targeted Next-Generation Sequencing of Solid Tumors
Source: PubMed Central journal article supplement — Cancer Res Treat. 2022 Nov 25;55(2):429–41. doi: 10.4143/crt.2022.891 (PMC10101781; doi:10.4143/crt.2022.891), 2023-04
Supplement: crt-2022-891-Supplementary-Table-4.pdf [file crt-2022-891-Supplementary-Table-4.pdf]

**S5 Table.** Verified mutated gene list of HD827, with known VAF

| Name  | Chromosome | Position  | Gene                      | Variant type | Variant        | Expected frequency (%VAF) |
|-------|------------|-----------|---------------------------|--------------|----------------|---------------------------|
| HD827 | chr1       | 115256530 | <i>NRAS</i>               | SNV          | p.Q61K         | 12.50                     |
|       | chr10      | 43613843  | <i>RET</i> <sup>a)</sup>  | SNV          | p.L769L        | 60.00                     |
|       | chr12      | 25398281  | <i>KRAS</i>               | SNV          | p.G13D         | 15.00                     |
|       | chr12      | 25398284  | <i>KRAS</i>               | SNV          | p.G12D         | 6.00                      |
|       | chr13      | 28578214  | <i>FLT3</i>               | INDEL        | p.P986fs*>8    | 10.00                     |
|       | chr13      | 32913558  | <i>BRCA2</i>              | INDEL        | p.K1691fs*15   | 32.50                     |
|       | chr17      | 7579472   | <i>TP53</i> <sup>a)</sup> | SNV          | p.P72R         | 92.50                     |
|       | chr3       | 41266101  | <i>CTNNB1</i>             | SNV          | p.S33Y         | 32.50                     |
|       | chr3       | 41266133  | <i>CTNNB1</i>             | INDEL        | p.S45del       | 10.00                     |
|       | chr3       | 178936091 | <i>PIK3CA</i>             | SNV          | p.E545K        | 9.00                      |
|       | chr3       | 178952085 | <i>PIK3CA</i>             | SNV          | p.H1047R       | 17.50                     |
|       | chr4       | 55599321  | <i>KIT</i> *              | SNV          | p.D816V        | 10.00                     |
|       | chr4       | 55602765  | <i>KIT</i>                | SNV          | p.L862L        | 7.50                      |
|       | chr4       | 153244155 | <i>FBXW7</i>              | INDEL        | p.S668fs*39    | 32.50                     |
|       | chr5       | 112175770 | <i>APC</i> <sup>a)</sup>  | SNV          | p.T1493T       | 35.00                     |
|       | chr7       | 55241707  | <i>EGFR</i>               | SNV          | p.G719S        | 24.50                     |
|       | chr7       | 55242464  | <i>EGFR</i>               | INDEL        | p.E746_A750del | 2.00                      |
|       | chr7       | 55249063  | <i>EGFR</i> <sup>a)</sup> | SNV          | p.Q787Q        | 15.00                     |
|       | chr7       | 55249071  | <i>EGFR</i>               | SNV          | p.T790M        | 1.00                      |
|       | chr7       | 55259515  | <i>EGFR</i>               | SNV          | p.L858R        | 3.00                      |
|       | chr7       | 116339847 | <i>MET</i>                | INDEL        | p.L238fs*25    | 7.00                      |
|       | chr7       | 116436022 | <i>MET</i> <sup>a)</sup>  | SNV          | p.A1357A       | 7.00                      |
|       | chr7       | 140453136 | <i>BRAF</i>               | SNV          | p.V600E        | 10.50                     |
|       | chr9       | 139409754 | <i>NOTCH1</i>             | SNV          | p.P668S        | 30.00                     |

VAF, variant of allele frequency. <sup>a)</sup>Excluded from the validation process (germline filter).
